Anesthesiology  
56:234, 1982

*In reply:*—We appreciate Dr. Karis's interest in our recent letter. I believe he underestimates somewhat the amount of heat a humidifier can deliver, for he has forgotten that when gas fully saturated at 47°C cools in the respiratory tract, water condenses giving up the heat of vaporization. Five liters of gas fully saturated at 47°C contains  $80/760 \times 5,000 = 526$  ml water vapor ( $P_{H_2O}$  at 47°C = 80 mmHg). When this gas is cooled to 37°C in a patient's respiratory tract, it will deliver  $526 - 309 = 217$  ml (0.159 g) of water as well as 92 calories from the condensation of the water. Compared to cold dry gas, the total calorie saving would be 264 cal/min at  $\dot{V}_I$  of 5,000 ml. We would use a  $\dot{V}_I$  of 7,000 ml in a 70-kg individual (dead-space gas must be included in heat calculations) and I therefore calculate the calorie saving from humidification to be 22,176 cal/h. Noback and Tinker<sup>1</sup> suggest that the drop in core temperature post-bypass is due to a loss of heat from the "core" to other parts of the body which are insufficiently rewarmed. If we assume the "core" consists of the vessel rich group (9 per cent body weight) plus the total intravascular volume (7 per cent body weight), then we are delivering

enough heat to prevent a 2°C/h drop in core temperature.

Mathematics aside, the technique works. Dr. Karis suggests we employ other more efficient measures but this is unlikely. We do use a warming blanket but have found as did Noback that it has little effect on core temperature. Our operating room is at 18°C and our patients are uncovered from chin to feet during the procedure. We still believe the technique is as safe in the adult population as it is in the pediatric age group and has proven effective not only in open heart patients but in those undergoing major intraabdominal procedures where heat loss is a problem.

ROBERT D. CRAWFORD, M.D.  
Department of Anesthesiology  
The Mason Clinic  
Seattle, Washington 98101

#### REFERENCES

1. Noback CR, Tinker JH: Hypothermia after cardiopulmonary bypass in man. *ANESTHESIOLOGY* 53:277-280, 1980

(Accepted for publication September 8, 1981.)

Anesthesiology  
56:234-235, 1982

### Nitrous Oxide As an Anti-stress Agent?

*To the Editor:*—The paper by Roizen *et al.* seems to highlight the possibility that the anti-stress effects of the anesthetic agents used may well have been partially mediated by the nitrous oxide ( $N_2O$ ) used as the common anesthetic vehicle.<sup>1</sup>

It has been shown both *in vivo*<sup>2,3</sup> and *in vitro*,<sup>4</sup> that  $N_2O$  at analgesic doses is an opiate agonist. The concentration of  $N_2O$  used in the study falls within the limits which could be considered analgesic.

It has been shown experimentally that there is an inhibitory feedback mechanism mediated by the adrenergic and opiate system involving the locus coeruleus,<sup>5</sup> and arcuate nucleus of the hypothalamus,<sup>6</sup> respectively. The anti-stress effect reported here may have been caused by the activation of this feedback mechanism by an opiate agonist.

There is some experimental evidence in man that  $N_2O$

analgesia has anti-stress properties.<sup>7,8</sup> In addition, a number of conditions with a large stress component such as postoperative pain,<sup>9</sup> asthma,<sup>10</sup> and the alcoholic withdrawal state<sup>11</sup> have been successfully treated with  $N_2O$  analgesia.

The effectiveness of  $N_2O$  in postoperative pain control<sup>9</sup> may not only result from its analgesic effect, but also by diminishing the excessive response to stress.

M. A. GILLMAN  
D. S. FOOTERMAN  
F. J. LICHTIGFELD

Department of Clinical and Experimental  
Pharmacology University of the Witwatersrand  
Hospital Street, Johannesburg, South Africa

# REFERENCES

1. Roizen MF, Horrigan RW, Frazer BM: Anesthetic doses blocking adrenergic (stress) and cardio-vascular responses to incision MAC BAR. *ANESTHESIOLOGY* 54:390-398, 1981
2. Gillman MA, Kok L, Lichtigfeld FJ: Paradoxical effect of naloxone on nitrous oxide analgesia in man. *Eur J Pharmacol* 61:175-177, 1980
3. Yang JC, Clark WC, Ngai SH: Antagonism of nitrous oxide analgesia by naloxone in man. *ANESTHESIOLOGY* 52:414-417, 1980
4. Ahmed MS, Byrne WL: Opiate receptor binding studies of a reversible sulphhydryl reagent, Endogenous and Exogenous Opiate Agonists and Antagonists. Edited by Way EL. New York Pergamon, 1980, pp 51-54
5. Aghajanian GK: Tolerance of locus coeruleus neurones to morphine and suppression of withdrawal response by clonidine. *Nature* 276:186-187, 1978
6. Strahlendorf HK, Strahlendorf JC, Barnes CD: Endorphin-mediated inhibition of locus coeruleus neurones: *Brain Res* 191:284-288, 1980
7. Steinberg H: Effects of nitrous oxide on reactions to stress. *Bull Br Psychol Soc* 24:12, 1954
8. Russell RW, Steinberg H: Effects of nitrous oxide on reactions to "stress". *Q J Exp Psychol* 7:67-73, 1955
9. Lipton S: Pain relief, Recent Advances in Anaesthesia and Analgesia, no. 12. Edinburgh, London and New York, Churchill Livingstone, 1976, pp 234-260
10. Smolinskii KI: Use of nitrous oxide with oxygen in paroxysms of bronchial asthma. *Sov Med* 24:114, 1960
11. Gillman MA, Lichtigfeld FJ: Management of alcohol withdrawal symptoms. *Br Med J* 283:64, 1981

(Accepted for publication September 22, 1981.)

Anesthesiology  
56:235, 1982

## Pitfalls in Deriving Pharmacokinetic Variables. I

*To The Editor:*—The reports of Morgan *et al.*<sup>1,2</sup> and the editorial by Stanski<sup>3</sup> fail to emphasize several problems in deriving the rate of elimination of a drug from its plasma concentration *vs.* time curve.

One problem is that in analyzing the plasma concentration *vs.* time curve over several hours, it is not possible to distinguish between elimination or irreversible loss of the drug from the plasma, and distribution of the drug into tissues with especially long time constants. For instance, for thiopental assuming 75 per cent protein binding, 20 per cent of the body weight consisting of fat, a fat/blood partition coefficient of 11,<sup>4</sup> and 7 per cent of a 6 l/min cardiac output going to fat, the time constant for fat tissue would be approximately 22 hours. Ghoneim and van Hamme's<sup>5</sup> three-compartment model predicts that distribution will be complete in approximately 2.5 hours after the bolus administration. One may reasonably assume that after this time the distribution of thiopental into fat is not complete. In fact, it may not be complete at the end of their 12 hour data collection period; thus, the drug that goes to fat during this period appears to be irreversibly lost, that is, it appears to be excreted. A similar "overestimation" of the true elimination of other drugs used during anesthesia may be found if plasma levels of the parent drug can be determined for several days.

Another problem is that the model independent pharmacokinetic variables, clearance and apparent volume of distribution, are derived by integrating the plasma concentration *vs.* time curve from the time of drug administration to infinity. Obviously, the shorter the data collection period, the larger the possible error in the integration, and hence in these two variables.

Pharmacokinetic studies of drugs used during anesthesia in which data are collected for several hours are still quite useful to anesthesiologists because they do describe the amount of drug in the plasma, and presumably the rapidly equilibrating tissues during the course of the average anesthetic period. One must be aware that the shorter studies may overestimate the importance of drug elimination and underestimate the importance of drug distribution. Further studies are needed to attempt to correlate the variation in pharmacokinetic variables seen between individuals and variations in those factors which influence drug distribution such as cardiac output, degree of protein binding and regional blood flow.

GUY TANNER, M.D.

Assistant Professor Anesthesiology  
Yale University School of Medicine  
New Haven, Connecticut 06510

# REFERENCES

1. Morgan DJ, Blackman GL, Paull JD, et al: Pharmacokinetics and plasma binding of thiopental. I: Studies in surgical patients. *ANESTHESIOLOGY* 54:468-473, 1981
2. Morgan DJ, Blackman GL, Paull JD, et al: Pharmacokinetics and plasma binding of thiopental. II: Studies at cesarean section. *ANESTHESIOLOGY* 54:474-480, 1981
3. Stanski DR: Pharmacokinetic modelling of thiopental. *ANESTHESIOLOGY* 54:446-448, 1981
4. Saidman LJ: Uptake, distribution, and elimination of barbiturates, Anesthetic Uptake and Action. Edited by Eger EI II. Baltimore, Maryland, Williams and Wilkins, Co., 1974, pp 265
5. Ghoneim MM, Van Hamme MJ: Pharmacokinetics of thiopentone: Effects of enflurane and nitrous oxide anaesthesia and surgery. *Br J Anaesth* 50:1237-1241, 1978

(Accepted for publication September 22, 1981.)
